# Supplementary material
Source: PubMed Central journal article supplement (PMC2680750)
Supplement: NIHMS94239-supplement-supplement_1.pdf [file NIHMS94239-supplement-supplement_1.pdf]

Supplementary figures (for reviewers only):

S1

A

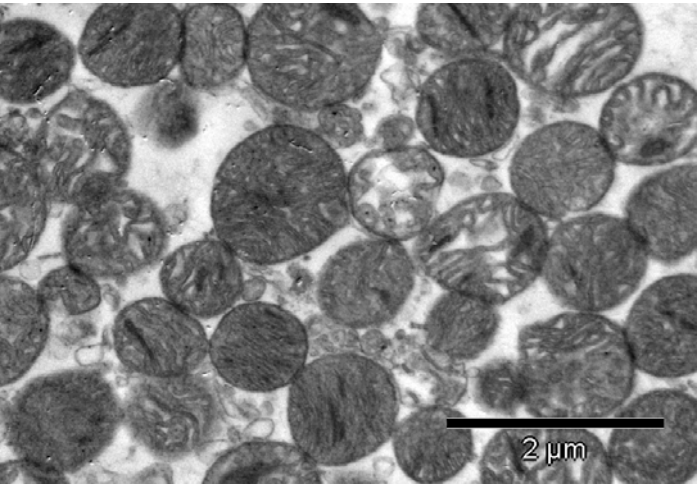

B

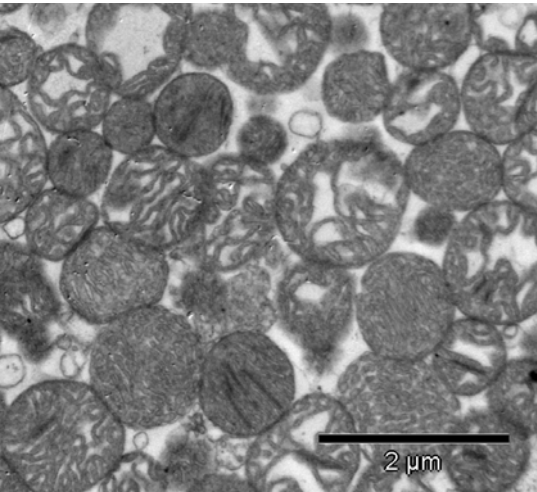

Representative TEM pictures of heart (A) SSM and (B) IFM, respectively.

S2

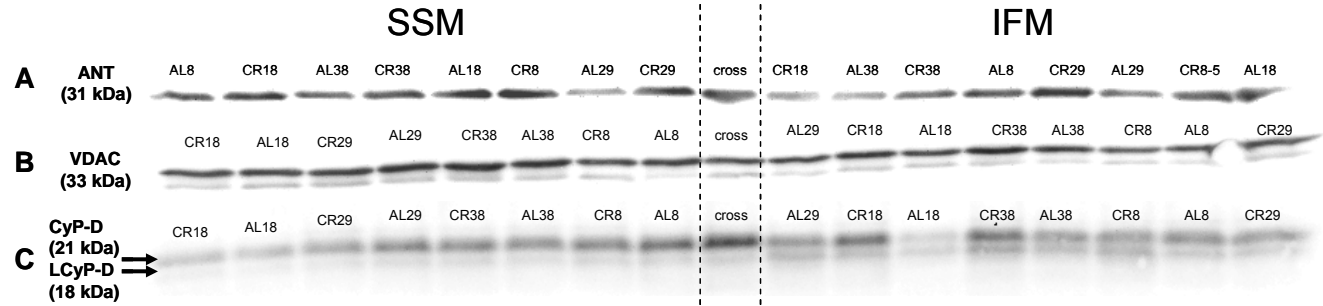

Representative gels of western blots. For CyP-D (C), two bands were observed, where the lighter protein was greater expressed in IFM than SSM (see also Fig. 5). Samples were ordered randomly.
